# Supplementary material
Source: Springer Nature journal article supplement (https://www.springermedizin.de/resource/supplementary/13002_2011_269_MOESM1_ESM.pdf/9627516)

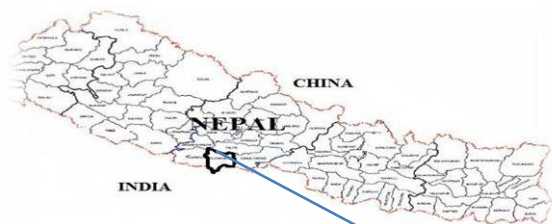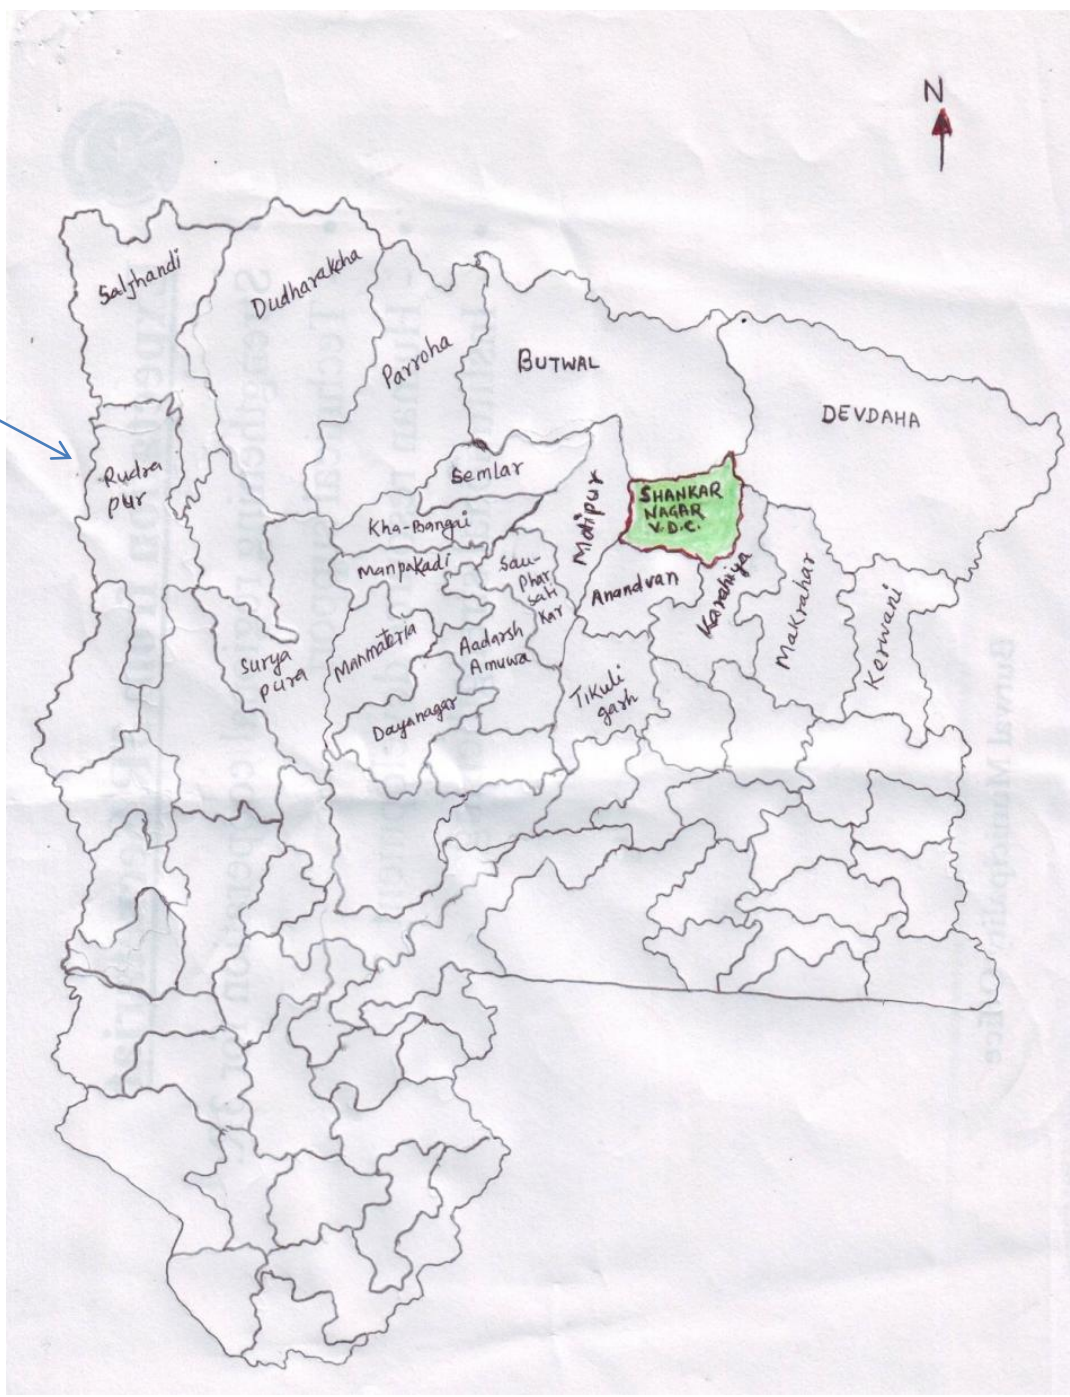



Supplement: MOESM1 [file 9627516]
